# Supplementary material for: CD11cHi monocyte-derived macrophages are a major cellular compartment infected by Mycobacterium tuberculosis
Source: PubMed Central journal article supplement (PMC7319360; doi:10.1371/journal.ppat.1008621), 2020-06-16
Supplement: ppat.1008621.s002.pdf [file ppat.1008621.s002.pdf]

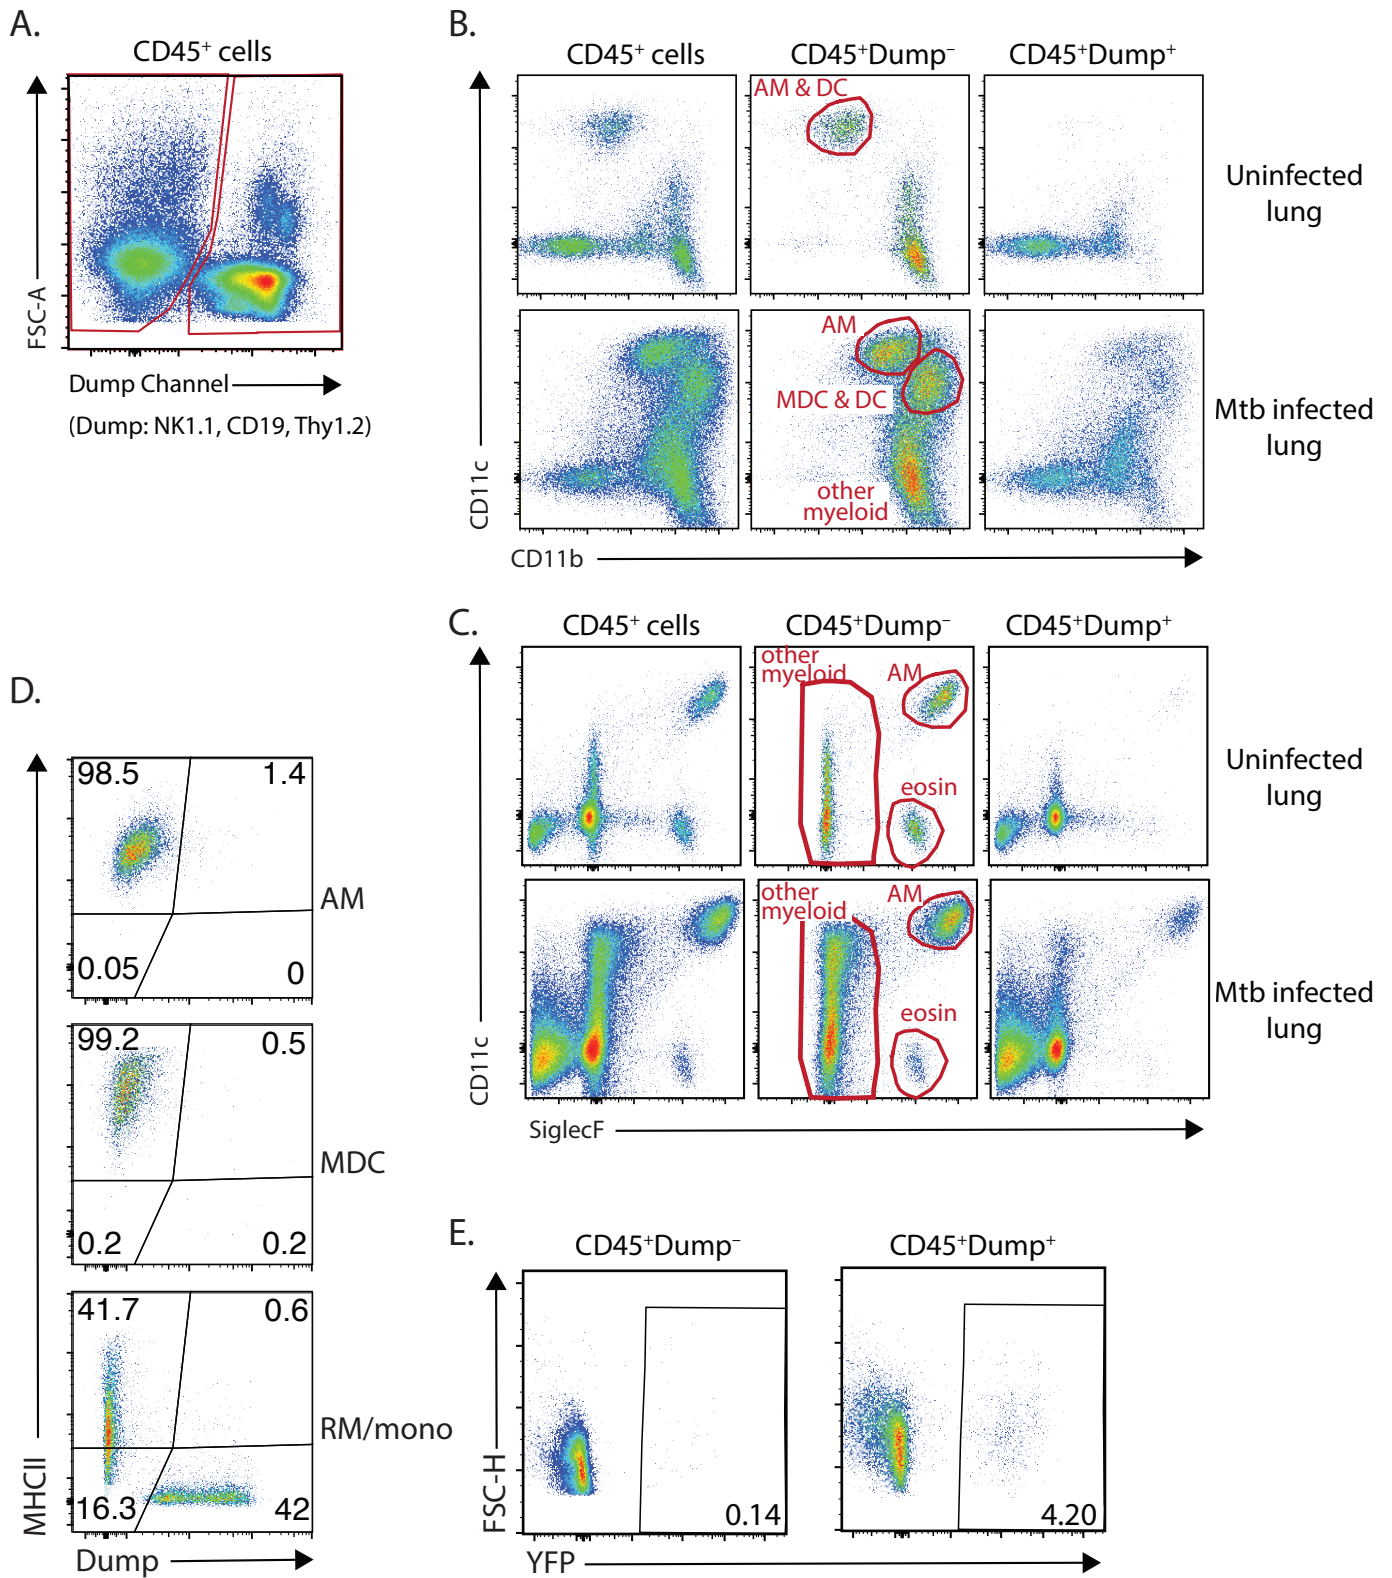

**Figure S2**
