# Supplementary material for: CD11cHi monocyte-derived macrophages are a major cellular compartment infected by Mycobacterium tuberculosis
Source: PubMed Central journal article supplement (PMC7319360; doi:10.1371/journal.ppat.1008621), 2020-06-16
Supplement: ppat.1008621.s004.pdf [file ppat.1008621.s004.pdf]

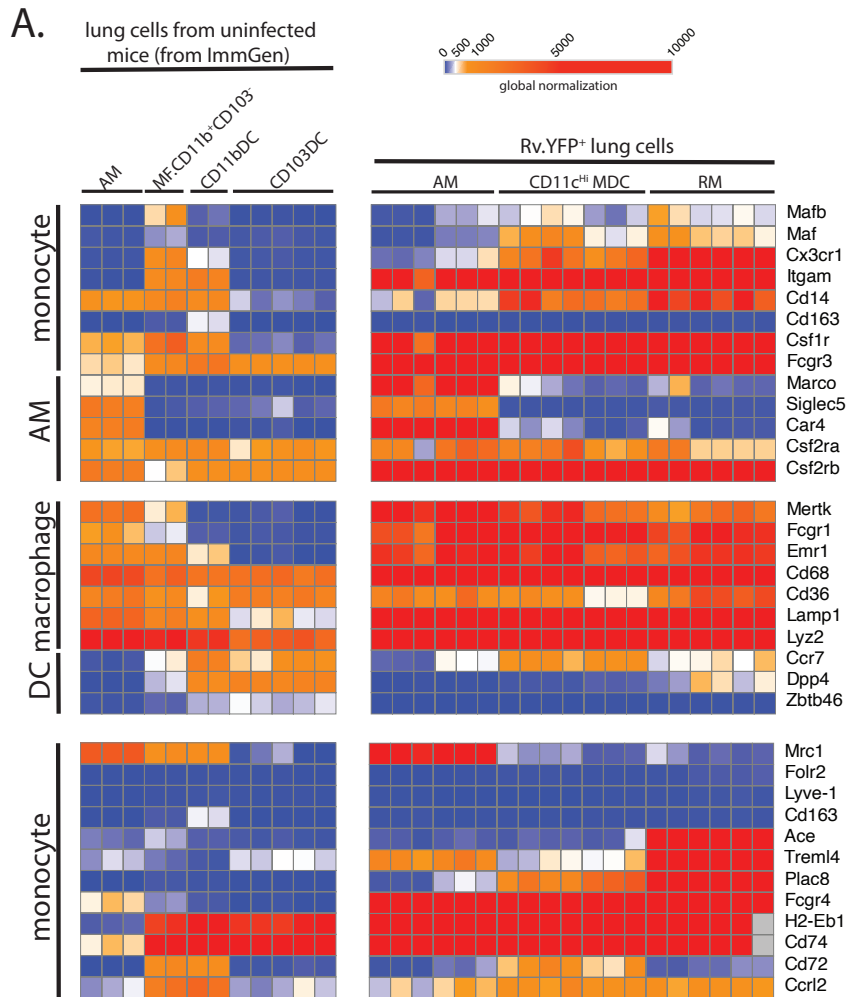

| Signature            | Ref |
|----------------------|-----|
| DC signature         | [1] |
| macrophage signature | [2] |
| AM vs. monocytes     | [3] |
| DC vs. macrophage    | [3] |
| Monocyte subtypes    | [4] |

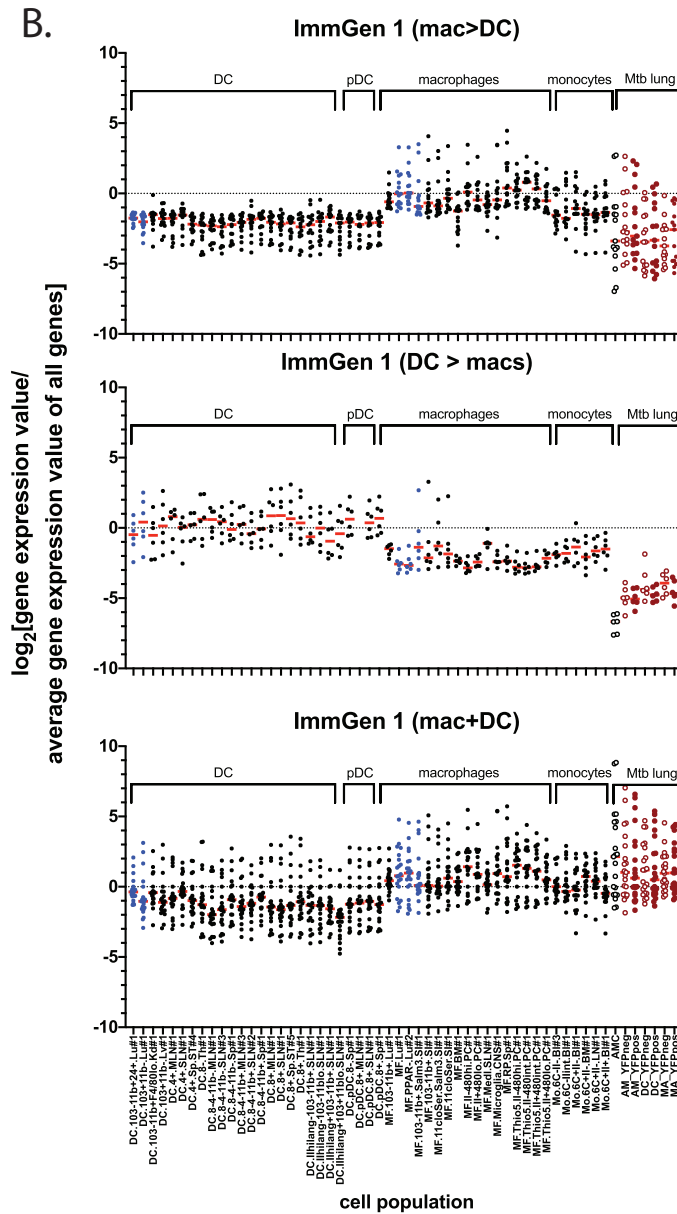

- C.** macrophages>DC
- Mertk
  - Tlr8
  - Fgd4
  - Tlr4
  - Ptgs1
  - Tmem195
  - Slc16a10
  - Mitf
  - Abcc5
  - Nfia
  - B3galt1
  - Tbc1d24
  - Sntb2
  - Zdhc1
  - 8430406107Rik
- DC>macrophages
- Btla
  - Ap1s3
  - Amica1
  - Sema7a
  - Strbp
  - Usp53

**Figure S4**
